# Supplementary material for: Dynamics of Reactive Carbonyl Species in Pea Root Nodules in Response to Polyethylene Glycol (PEG)-Induced Osmotic Stress
Source: MDPI journal article supplement (doi:10.3390/ijms23052726), 2022-03-01
Supplement: s1 [file s1]

**Dynamics of reactive carbonyl species in pea root nodules in response to osmotic stress –  
a new metabolic bridge to drought-related suppression of symbiotic efficiency**

Alena Soboleva,<sup>1,2\*</sup> Nadezhda Frolova,<sup>3</sup> Kseniia Bureiko,<sup>1,2,4</sup> Julia Shumilina,<sup>1,2</sup> Gerd U.  
Balcke,<sup>5</sup> Vladimir A. Zhukov,<sup>6</sup> Igor A. Tikhonovich,<sup>6,7</sup> Andrej Frolov,<sup>1,2\*</sup>

**Supplementary information 1**

<sup>1</sup>Department of Bioorganic Chemistry, Leibniz Institute of Plant Biochemistry, <sup>2</sup>Department  
of Biochemistry, St. Petersburg State University, <sup>3</sup>Department of Plant Physiology and  
Biochemistry, St. Petersburg State University, <sup>4</sup>Institute of Biomedicine, University of  
Eastern Finland, Kuopio, Finland, <sup>5</sup>Department of Metabolic and Cell Biology, Leibniz  
Institute of Plant Biochemistry, <sup>6</sup>All-Russia Research Institute for Agricultural Microbiology  
and <sup>7</sup>Department of Genetics and Biotechnology, St. Petersburg State University

\*Corresponding authors:

Mrs. Alena Soboleva

Leibniz Institute of Plant Biochemistry

Department of Bioorganic Chemistry

Weinberg 3

06120, Halle (Saale), Germany

Tel: +49 (0) 345 5582 1367

Fax: +49 (0) 345 5582 1359

E-mail: asoboleva@ipb-halle.de

Dr. Andrej Frolov

Leibniz Institute of Plant Biochemistry

Department of Bioorganic Chemistry

Weinberg 3

06120, Halle (Saale), Germany

Tel: +49 (0) 345 5582 1350

Fax: +49 (0) 345 5582 1359

Email: afrolov@ipb-halle.de

## Directory

|                      |                                                                                                                                                                             |       |
|----------------------|-----------------------------------------------------------------------------------------------------------------------------------------------------------------------------|-------|
| <b>Protocol S1-1</b> | Correction of analyte intensity data for derivative stability.....                                                                                                          | S1-3  |
| <b>Protocol S1-2</b> | Determination of malondialdehyde (MDA) contents .....                                                                                                                       | S1-5  |
| <b>Protocol S1-3</b> | Quantification of ascorbic acid and dehydroascorbate .....                                                                                                                  | S1-6  |
| <b>Table S1-1</b>    | The conditions of UHPLC separation and the settings for ESI-QqQ-MS/MS.....                                                                                                  | S1-7  |
| <b>Table S1-2</b>    | Instrument settings applied for Orbitrap-LIT-MS experiments.....                                                                                                            | S1-11 |
| <b>Figure S1-1</b>   | Cultivation of pea ( <i>P. sativum</i> ) plants.....                                                                                                                        | S1-13 |
| <b>Figure S1-2</b>   | Physiological and biochemical characterization of pea ( <i>P. sativum</i> ) plant response to osmotic stress.....                                                           | S1-14 |
| <b>Figure S1-3</b>   | Clusterization of stability time curves of individual CHH derivatives of RCCs by characteristic kinetics profiles.....                                                      | S1-15 |
| <b>Figure S1-4</b>   | Types of stability profiles/degradation kinetics observed for CHH derivatives of RCCs.....                                                                                  | S1-16 |
| <b>Figure S1-5</b>   | Hierarchical clustering analysis with heatmap representation generated without application of correction for the changes in analyte abundance within the analysis time..... | S-17  |
| <b>Figure S1-6</b>   | Fragmentation patterns of the CHH derivatives of 4,5-dioxovaleric acid and glyceraldehyde.....                                                                              | S1-18 |
| <b>Figure S1-7</b>   | Tandem mass spectrum of the unknown CHH derivative isomer 2 ( <i>m/z</i> 758.5685) .....                                                                                    | S1-19 |
| <b>References</b>    | .....                                                                                                                                                                       | S1-20 |

## Protocols

### Protocol S1-1 Correction of analyte intensity data for derivative stability

#### 1. *Data uploading*

Using the *pandas* Python package, the matrix for pools (quality control, QC, designed as a pool of all experimental and control samples), control, and experimental samples with matched intensities for 194 compounds was uploaded as a *pandas DataFrame* from the csv file. Each sample was assigned to a certain time based on the timing of the instrumental sequence queue. The sequence queue was timed by QC, thereby the first QC served as the 0 point.

#### 2. *Clustering*

Only QCs were used for clustering analysis of analyte kinetics behavior. It is important to note that the K-means clustering algorithm operates with the distances between individual features. Thereby, obviously, the differences in distances between high- and low-abundant signals will contribute more to the result, than the differences in degradation kinetics. This would result in clusters reflecting individual intensity-based variations rather than kinetics-based ones. This situation can be avoided by reduction of variables to the same scale for all analytes, i.e. by introduction a scaling procedure. This solution was implemented here by means of *Time Series Scaler MinMax* and *Time Serie sScaler Mean Variance* from the *tslean* package. The first approach yielded better results (in terms of significance of cluster definition) in first trials and was used, therefore, in all further analyses.

Furthermore, because the distance is not readily defined for time series data, it is important to consider utilizing variants of standard algorithms with alternative distance metrics suited for time series analysis, even if we have a small number of time points in our case study. For clustering *TimeSeriesKMeans* from *tslearn* package was used with different distance metrics

(Euclidian, Dynamic Time Warping (DTW) and DTW Barycenter Averaging (DBA)) and different number of clusters. Produced clusters appeared to be quite similar. Manual verification of the results obtained with all individual features allowed choosing the distance metric and number of clusters that produce the most relevant results for this task.

### **3.     *Regression analysis***

Only pooled QC samples were used for linear regression analysis. Based on statistical analysis, the stability correction was applied to the cluster with the greatest RSDs and the most pronounced changes in compound abundance, corresponding to a substantial drop in compound abundance. These compounds were clustered once more in order to choose the degree of polynomial features in linear regression models for distinct types of degradation kinetics and avoid overfitting. The coefficient of determination and root mean square deviation were used to evaluate and compare the models' performance. Regression analysis was used to fit a predictive model to the original observed intensities of single compounds, and it was carried out according to standard procedure using the *sklearn* Python package.

### **4.     *Correction***

In this part, the resulting model is utilized to estimate compound intensities at time points in the control and stress samples when true values were not observed. These values are then used to determine the coefficients for stability correction in control and stress samples as ratio of predicted value to intensity at the start of the experiment. These coefficients are then multiplied by the measured values in the control and stress samples. Finally, dry weight normalization was applied to all compounds and the results were extracted for further statistical analysis.

**Protocol S1-2** Determination of malondialdehyde (MDA) contents

Determination of malondialdehyde (MDA) contents relied on Chantseva et al [1]. In detail, approximately 25 mg of frozen grinded plant material were left on ice for 3 minutes, before addition of 300  $\mu\text{L}$  5% (w/v) trichloroacetic acid (TCA), vortexed for 30 s and centrifuged at 10000 g for 20 minutes at 4°C. 250  $\mu\text{L}$  of supernatant were transferred in a new polypropylene tube, and 1000  $\mu\text{L}$  of thiobarbituric acid (TBA) reagent (0.5 % w/v TBA in 20% TCA) were added. The mixture was incubated for 30 min in boiling water bath (95°C). Afterwards, the mixture was cooled on ice to stop the reaction, centrifuged at 1900 g for 10 minutes at 4°C and 1 ml of colored supernatant was used to measure the absorbance at 532 nm against the proper blank (250  $\mu\text{L}$  5% w/v TCA and 750  $\mu\text{L}$  TBA reagent). The non-specific absorbance at 600 nm was subtracted from the absorbance acquired at 532 nm. The contents of MDA equivalents were calculated with  $\varepsilon = 155 \text{ mM}^{-1}\text{cm}^{-1}$

**Protocol S1-3** Quantification of ascorbic acid and dehydroascorbate

Ascorbic and dehydroascorbic acids (Asc and DHA, respectively) were quantified in leaf tissue using an adaption of the method described by Frolov and co-workers [2]. In detail, 50 mg of frozen thallus material were left on ice for 3 min before 0.5 mL of ice-cold  $\text{HClO}_4$  (2.5 mol/L) was added. The suspensions were vortexed for 30 s and centrifuged (10 min, 10,000 g, 4°C). The supernatants were transferred to new polypropylene tubes, neutralized with saturated  $\text{Na}_2\text{CO}_3$  solution and diluted 10-fold with 0.1 mol/L sodium phosphate buffer (pH 5.6). For determination of ascorbic acid, 500  $\mu\text{L}$  of the diluted extract was placed in a quartz cuvette and the absorbance at 265 nm was recorded (UV spectrophotometer, Beckman Coulter Deutschland, Krefeld, Germany) before 1 U of ascorbate oxidase (i.e. 1  $\mu\text{L}$  in 4 mmol/L sodium phosphate buffer, pH 5.6) was added, and absorbance was recorded at the same wavelength after 2 min incubation at room temperature (RT). Total ascorbate was quantified after reduction of diluted extract with DTT (3  $\mu\text{L}$  of 3 mol/L solution) for 1 min on ice at the same wavelength. Dehydroascorbic acid was calculated as the difference between the total ascorbate and ascorbic acid contents.

## Tables

**Table S1-1** The conditions of ultrahigh performance liquid chromatographic (UHPLC) separation and the settings for electrospray ionization-triple quadrupole-tandem mass spectrometry (ESI-QqQ-MS/MS) used for analysis of abscisic acid (ABA), jasmonic acid (JA), its isoleucine conjugate (JA-Ile) and 12-oxophytodienic acid (OPDA) in methanolic extracts of pea (*Pisum sativum* L., cultivar SGE) seeds with Waters ACQUITY UPLC H-Class UPLC System (Waters GmbH, Eschborn, Germany) coupled online to a hybrid triple quadrupole-linear ion trap mass spectrometer (QqLIT) AB Sciex QTRAP 6500 (AB Sciex, Darmstadt, Germany).

### Chromatography

| ACQUITY Sample Manager (SM) |                                                                  |
|-----------------------------|------------------------------------------------------------------|
| Injection mode              | Partial Loop                                                     |
| Injection volume            | 5 µL                                                             |
| Weak wash solvent           | 0.3 mmol/L aq. ammonium formate                                  |
| Weak wash volume            | 1200 µL                                                          |
| Strong wash solvent         | Acetonitrile                                                     |
| Strong wash volume          | 600 µL                                                           |
| Target sample temperature   | 5.0 C                                                            |
| Needle overfill flush       | Automatic                                                        |
| Column conditions           |                                                                  |
| Separation column           | EC 150/2 NUCLEOSHELL RP 18<br>(150 x 2 mm, particle size 2.7 µm) |
| Target column temperature   | 40.0 C                                                           |

---

**ACQUITY Binary Solvent Manager (BSM)**

---

|                    |                                                                                                                                                                                                    |
|--------------------|----------------------------------------------------------------------------------------------------------------------------------------------------------------------------------------------------|
| Eluent A           | 0.3 mmol/L aq. ammonium formate                                                                                                                                                                    |
| Eluent B           | Acetonitrile                                                                                                                                                                                       |
| Seal wash duration | 5 min                                                                                                                                                                                              |
| Flow rate          | 0.4 mL/min                                                                                                                                                                                         |
| Elution program    | 5% eluent B isocratic – 2 min<br>gradient to 95% eluent B – 5.5 min<br>95% eluent B isocratic – 2 min<br>gradient to 5% eluent B – 0.01 min<br>5% eluent B isocratic – 1.99 min (re-equilibration) |

---

**Mass spectrometry**

---

**General**

---

|                           |                                                  |
|---------------------------|--------------------------------------------------|
| Mass analyzer type        | triple quadrupole-linear ion trap (QqLIT, QTRAP) |
| Ion source                | Turbo Ion Spray <sup>®</sup>                     |
| Experiment type           | multiple reaction monitoring (MRM)               |
| Operation mode            | negative                                         |
| Cycle time (ms)           | 950                                              |
| Pause between ranges (ms) | 5.007                                            |
| Settling time (s)         | 0                                                |
| Duration                  | 11 min                                           |

---

**Ion source settings**

---

|                      |    |
|----------------------|----|
| Nebulizer gas (psig) | 60 |
|----------------------|----|



|                             |      |
|-----------------------------|------|
| Drying gas (psig)           | 70   |
| Curtain gas (psig)          | 40   |
| Ion spray voltage (kV)      | -4.5 |
| Ion source temperature (°C) | 450  |

---



---

### MS/MS Setting

---

|                                |                                     |
|--------------------------------|-------------------------------------|
| Fragmentation mode             | CAD                                 |
| MS/MS experiment type          | MRM                                 |
| Collision gas                  | nitrogen                            |
| Collision gas pressure         | 3 psig (medium)                     |
| Entrance potential (V)         | -10.0                               |
| Scheduled MRM                  | enabled                             |
| Scheduled MRM type             | basic                               |
| MRM detection window (s)       | 500                                 |
| Target scan time (s)           | 1                                   |
| Dwell time                     | adjusted by scheduled MRM algorithm |
| Q1 resolution                  | unit                                |
| Q3 resolution                  | unit                                |
| Declustering potential (DP, V) | compound-specific                   |
| Collision potential (CE, V)    | compound-specific                   |
| Exit potential (CXP, V)        | compound-specific                   |

---

### Analyte-specific settings

---

#### Analyte-specific combinations of Q1 and Q3 $m/z$ ranges (transitions)

---

| Analyte | $t_R$<br>(min) | Q1<br>( $m/z$ ) | Q3<br>( $m/z$ ) | DP<br>(V) | CE (V) | CXP<br>(V) |
|---------|----------------|-----------------|-----------------|-----------|--------|------------|
|---------|----------------|-----------------|-----------------|-----------|--------|------------|

---

|                       |     |       |       |       |       |       |
|-----------------------|-----|-------|-------|-------|-------|-------|
| abscisic acid 01      | 4.8 | 263.0 | 152.9 | -20.0 | -16.0 | -9.0  |
| abscisic acid 02      | 4.8 | 263.0 | 219.0 | -20.0 | -18.0 | -13.0 |
| (d6) abscisic acid 01 | 4.8 | 269.0 | 159.0 | -20.0 | -16.0 | -9.0  |
| (d6) abscisic acid 02 | 4.8 | 269.0 | 225.0 | -20.0 | -18.0 | -13.0 |

**Table S1-2** Instrument settings applied for Orbitrap-LIT-MS experiments

| Parameter                            | Setting                          |
|--------------------------------------|----------------------------------|
| MS conditions                        |                                  |
| Ionization mode                      | Positive                         |
| Mass analyzer                        | LIT-Orbitrap (FT-scan)           |
| Ion spray voltage (IS)               | 4.5 kV                           |
| Nebulizer gas                        | 35 psig                          |
| Auxillary gas                        | 15 psig                          |
| Capillary temperature                | 300 °C                           |
| Mass to charge ratio ( $m/z$ ) range | 280 – 2000                       |
| Resolution                           | 30000                            |
| MS/MS conditions                     |                                  |
| Ionization mode                      | Positive                         |
| Mass analyzer                        | LIT (IT-scan)                    |
| Ion spray voltage (IS)               | 4.5 kV                           |
| Fragmentation                        | Collision activated dissociation |
| Isolation width                      | 2 Da                             |
| Normalized collision energy          | 30%                              |
| Activation frequency                 | 0.25 Hz                          |
| Activation time                      | 10 ms                            |
| Default charge state                 | 1                                |
| Dynamic exclusion repeat count       | 1                                |

|                              |                                                                                  |
|------------------------------|----------------------------------------------------------------------------------|
| Dynamic exclusion duration   | 20 s                                                                             |
| Dynamic repeat duration      | 30 s                                                                             |
| Dynamic exclusion mass width | $\pm 1.5$ ppm                                                                    |
| Mass ranges ( $m/z$ )        | 280-2000, 280-400, 395-500, 495-<br>600, 595-700, 695-800, 795-900,<br>895-1000, |

---

## Figures

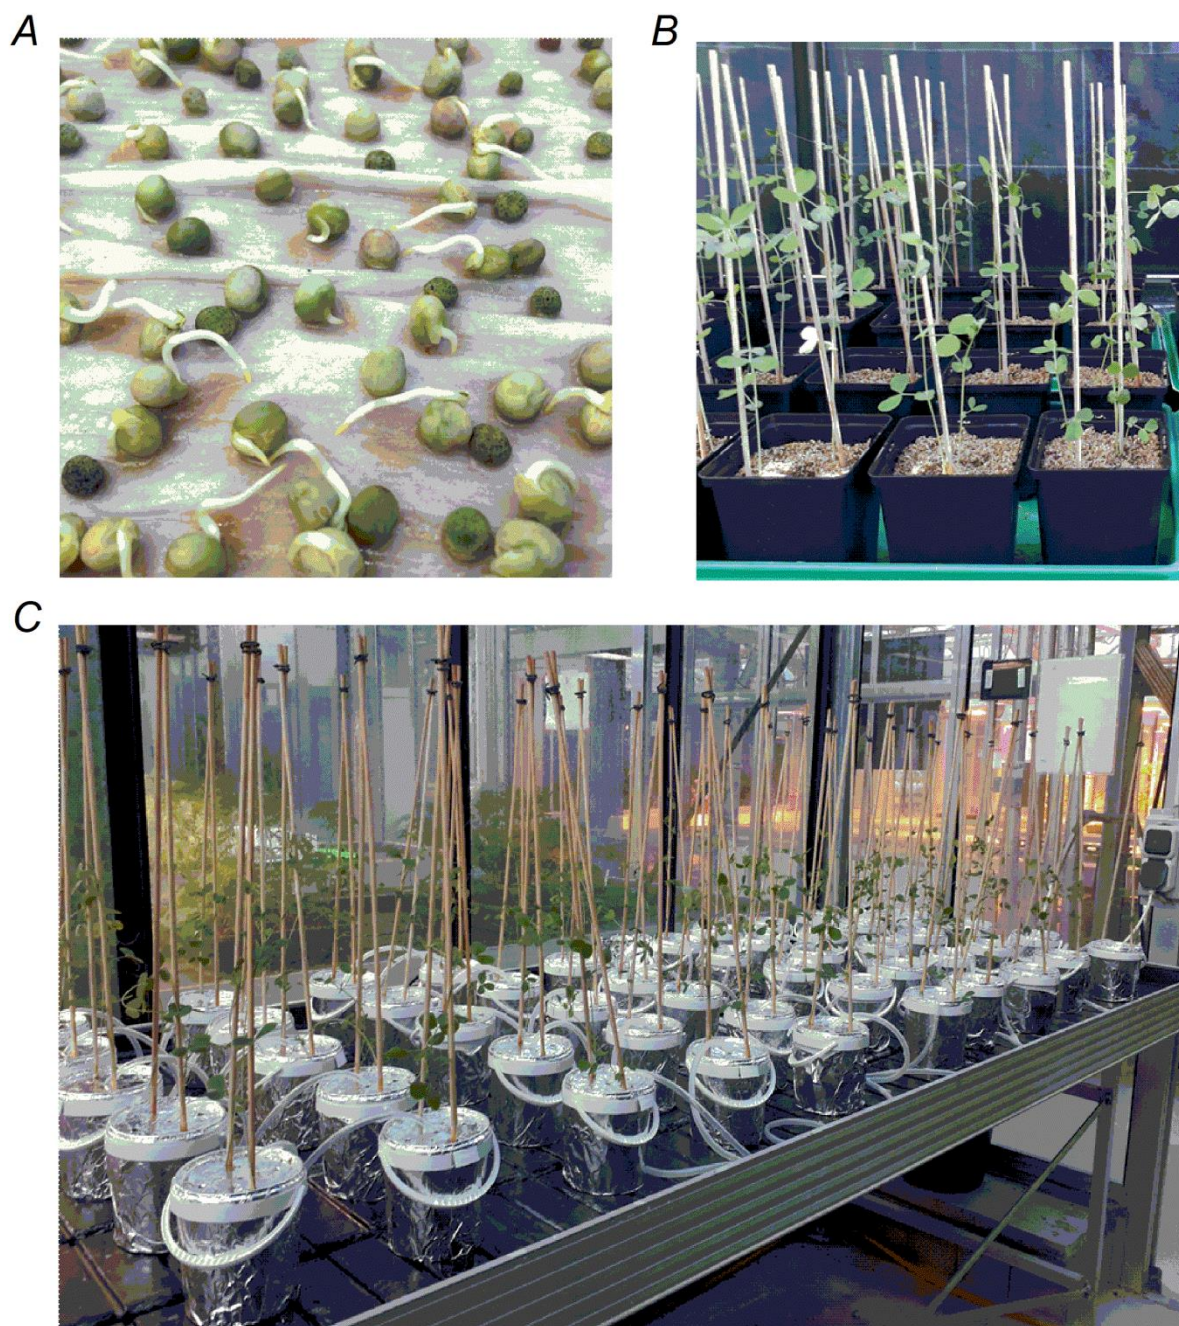

**Figure S1-1** Cultivation of pea (*P. sativum*) plants: germinating seeds (two-day seedlings, A), two week-old plants before transfer to the hydroponic system (B), three week-old plants grown in the hydroponic system (C)

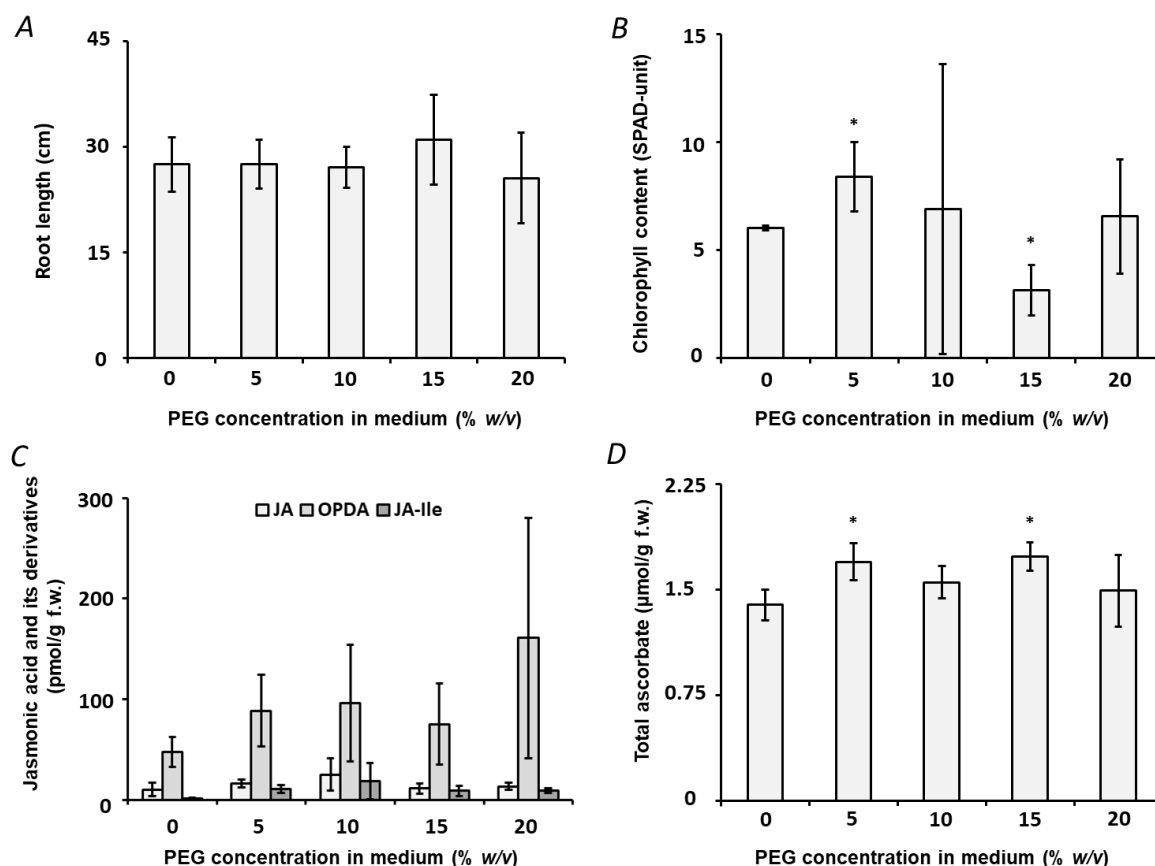

**Figure S1-2** Physiological and biochemical characterization of pea (*P. sativum*) plant response to osmotic stress applied by transfer of two week-old plants to aqueous growth medium (with composition specified in the Material and method part) supplemented with 5, 10, 15 and 20% (w/v) PEG8000 for one week (controls were grown in PEG-free medium). The plant stress response was characterized at the end of the treatment period (7 days) with root length (A), chlorophyll content (B), content of jasmonic acid, its isoleucine conjugate (JA-Ile) and 12-oxophytodienic acid (OPDA) (C) and total ascorbate content (D). Statistically significant differences (t-test,  $p \leq 0.05$ ) are marked with asterisk.

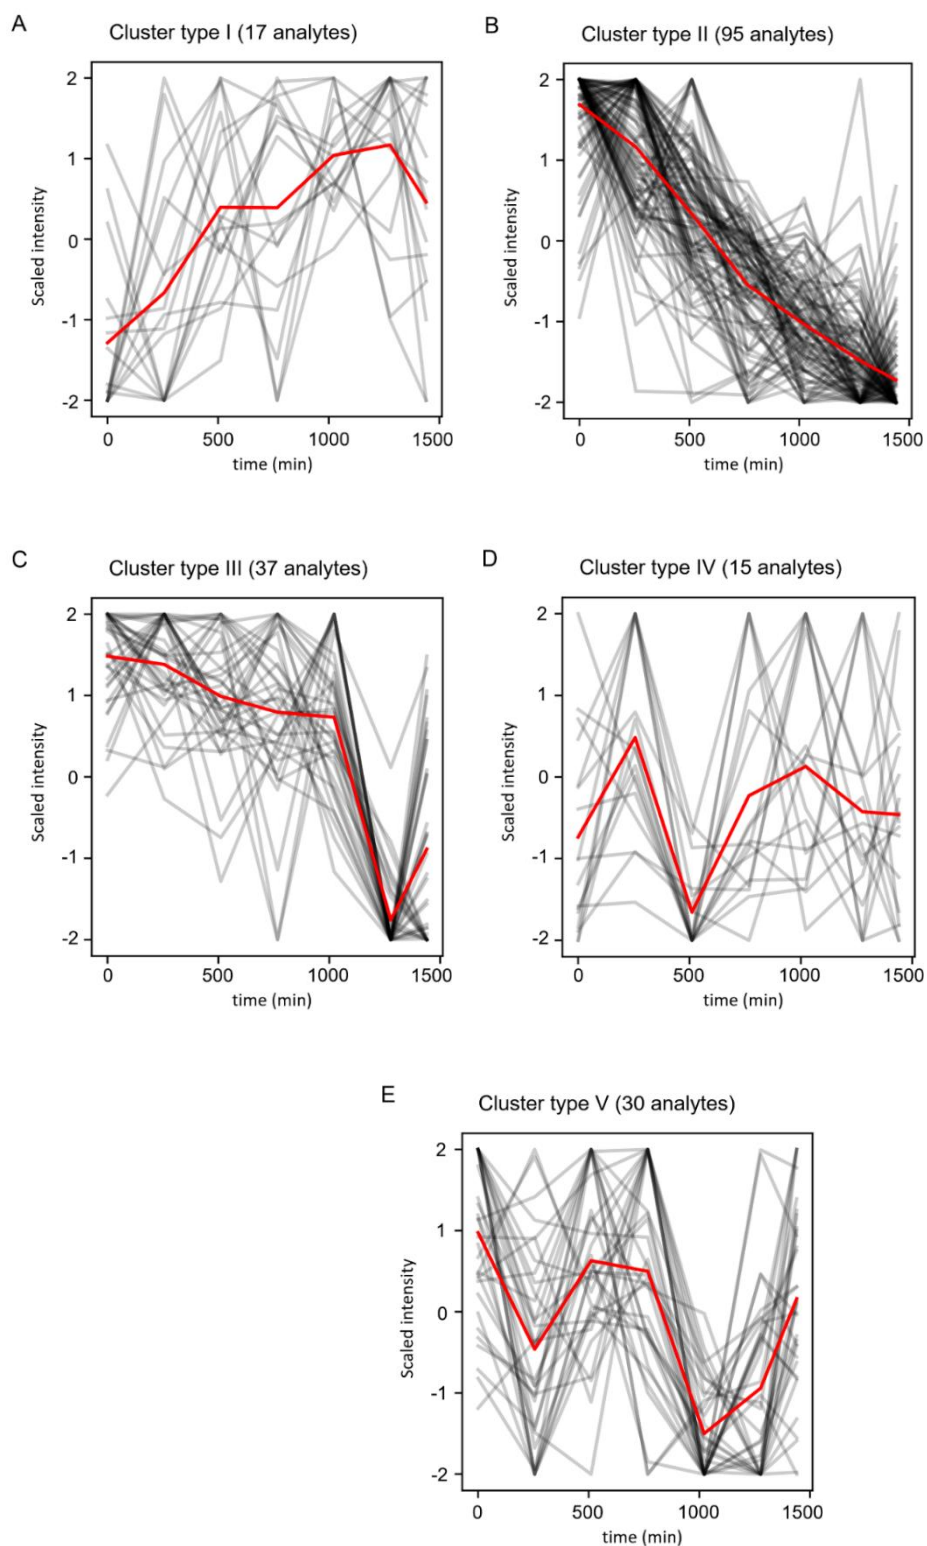

**Figure S1-3** Cluster analysis of stability time curves of individual CHH derivatives of RCCs by characteristic kinetics profiles. Clustering relied on the standard K-means algorithm with Euclidian distance and pre-determined number of cluster 5 for preliminarily scaled dataset.



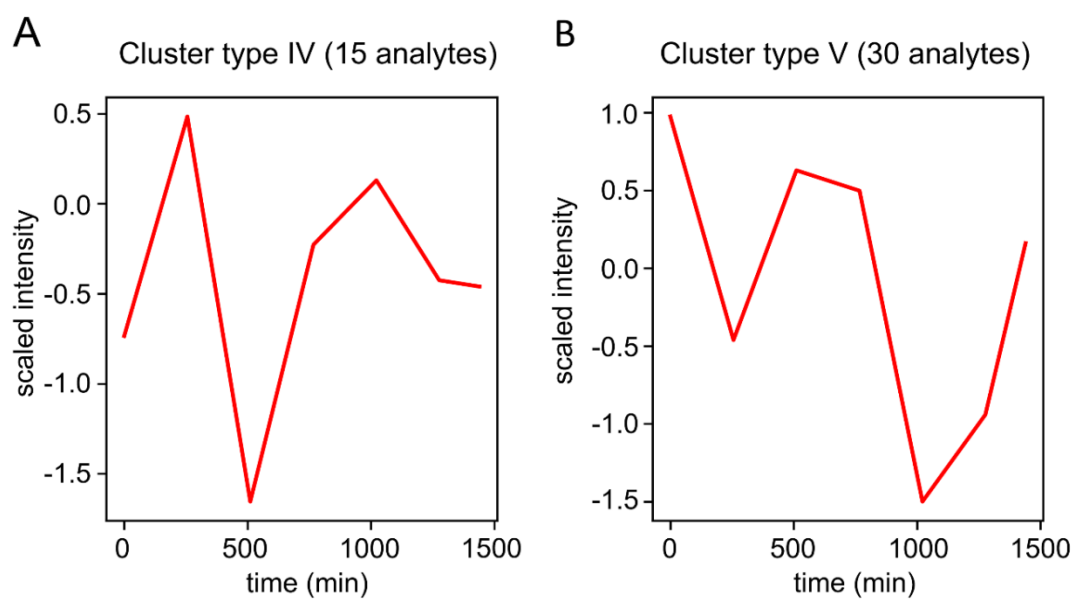

**Figure S1-4** Types of stability profiles/degradation kinetics observed for CHH derivatives of RCCs. The centroids of the final clusters are defined as the average pattern from time curves of individual CHH derivatives of RCCs in a certain cluster produced using K-means clustering.



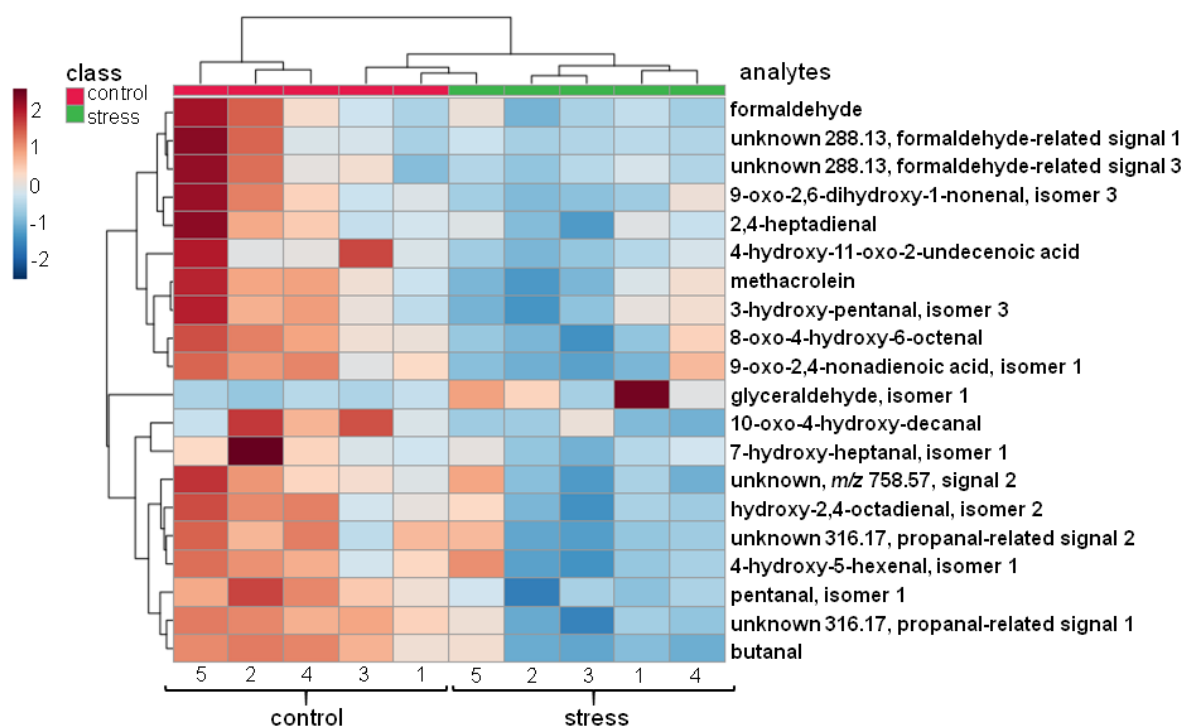

**Figure S1-5** Hierarchical clustering with heatmap representation generated without application of correction for the changes in analyte abundance within the analysis time. The heatmap illustrates stress-dependent differential regulation of 20 RCCs in the root nodules of control and experimental pea (*P. sativum*) plants, treated with 10% (w/v) PEG8000 supplemented to the hydroponic growth medium for one week.

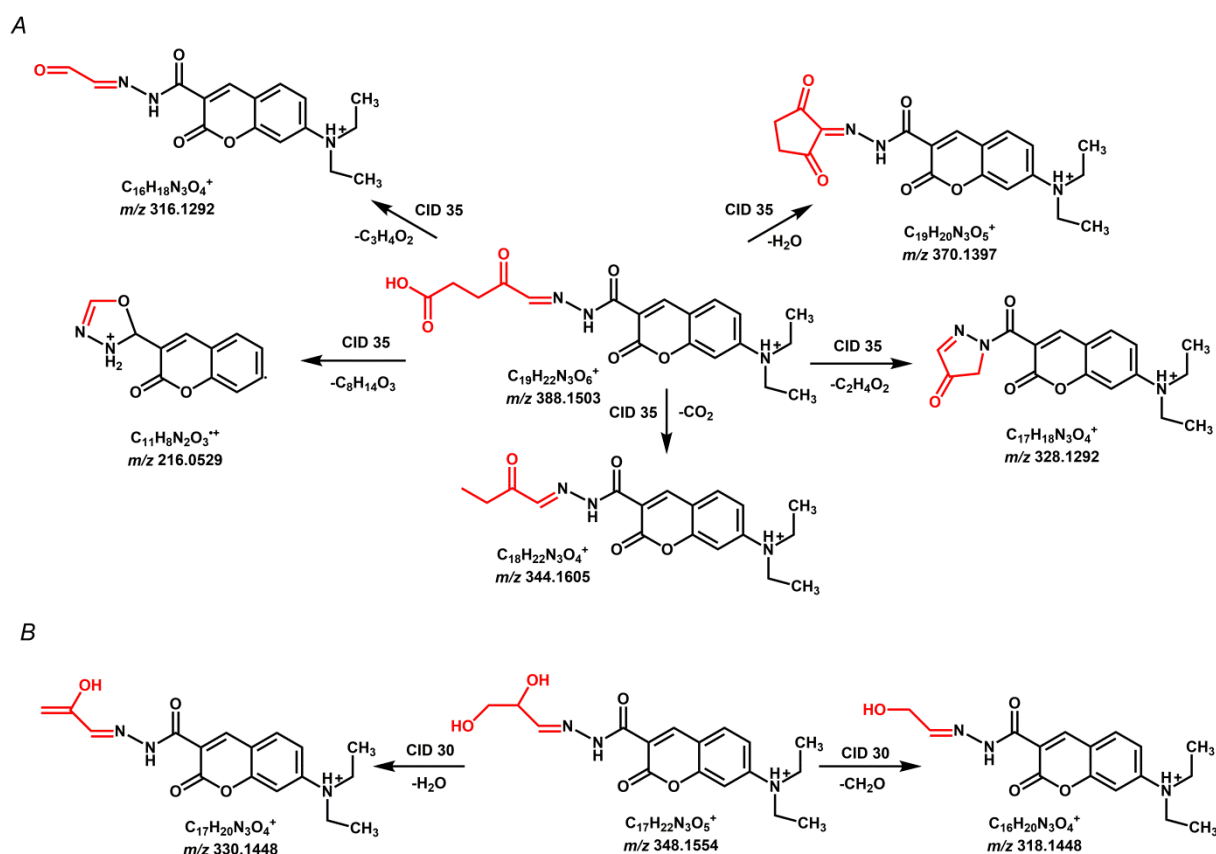

**Figure S1-6** Fragmentation patterns of the CHH derivatives of 4,5-dioxovaleric acid at  $m/z$  388.1503 (A) and glyceraldehyde at  $m/z$  348.1554 (B) stress-dependently up-regulated in the root nodules of pea (*P. sativum*) plants, which were treated with 10 % (w/v) PEG8000 supplemented to the hydroponic growth medium for one week. The MS/MS analysis was accomplished in positive ion mode using collision-induced dissociation (CID) functionality of the linear ion trap (LIT) mass analyzer (30 % (A) and 35 % (B) normalized collision energy) of the Orbitrap Elite mass spectrometer. The part of the derivative corresponding to the RCC structure is marked red.

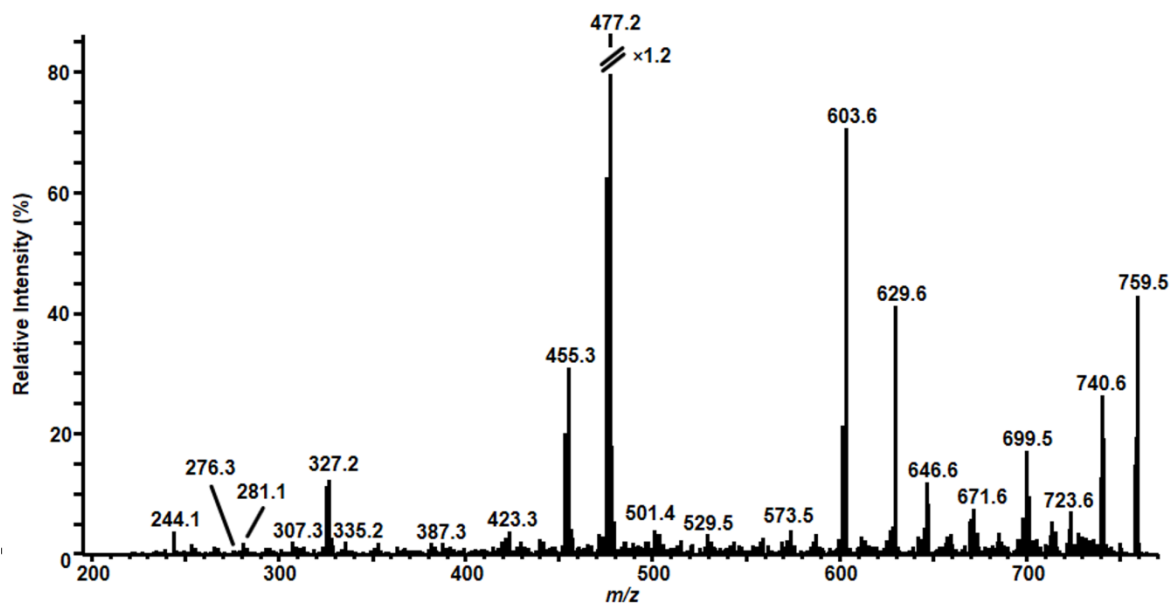

**Figure S1-7** Tandem mass spectrum of the unknown CHH derivative isomer 2 ( $m/z$  758.5685) differentially regulated in the root nodules of control and experimental pea (*P. sativum*) plants, treated with 10 % (w/v) PEG 8000 supplemented to the hydroponic growth medium for one week. The spectrum was acquired in positive ion mode using CID functionality of the LIT mass analyzer (35 % normalized collision energy) of the Orbitrap Elite mass spectrometer.

## References

1. Chantseva V, Bilova T, Smolikova G, Frolov A, Medvedev S (2019) 3D-clinorotation induces specific alterations in metabolite profiles of germinating *Brassica napus* L. seeds. *Biological Communications* 64:55-74-55–74 .  
<https://doi.org/10.21638/spbu03.2019.107>
2. Frolov A, Bilova T, Paudel G, Berger R, Balcke GU, Birkemeyer C, Wessjohann LA (2017) Early responses of mature *Arabidopsis thaliana* plants to reduced water potential in the agar-based polyethylene glycol infusion drought model. *J Plant Physiol* 208:70–83 .  
<https://doi.org/10.1016/j.jplph.2016.09.013>
